# Supplementary material
Source: Elsevier journal article supplement (https://api.immotoolbox.com/fiche/fr/montecarlo/99519/pdfv3/mmc7.pdf)

## A LOUER FONTVIEILLE 7 PIECES D'EXCEPTION AVEC PISCINE PRIVÉE

Location Monaco

60 000 € / mois

Ce bel appartement est situé au dernier étage d'une résidence de standing avec sécurité 24h/24. L'appartement est en parfait état, avec des chambres spacieuses et des espaces extérieurs agréables. L'appartement bénéficie d'une vue magnifique sur la mer et le port de Cap d'Ail. Il se compose d'un hall d'entrée, d'un grand salon, d'une salle à manger, d'une cuisine entièrement équipée, de cinq chambres en suite avec salle de bains/douche et dressing, dont une suite parentale très spacieuse, d'une buanderie et d'un WC invités. L'appartement dispose également d'une piscine privée et d'une plage, ainsi que d'une terrasse de jardin. Deux caves et quatre places de parking complètent l'appartement.

|                     |                    |              |              |
|---------------------|--------------------|--------------|--------------|
| Type de produit     | Penthouse/Roof     | Nb. pièces   | 5+           |
| Superficie totale   | 702 m <sup>2</sup> | Nb. chambres | 5            |
| Superficie hab.     | 366 m <sup>2</sup> | Nb. parking  | 4            |
| Superficie terrasse | 126 m <sup>2</sup> | Nb. caves    | 1            |
| Superficie jardin   | 210 m <sup>2</sup> | Immeuble     | Memmo Center |
| Date de libération  | 01/06/2024         | Quartier     | Fontvieille  |

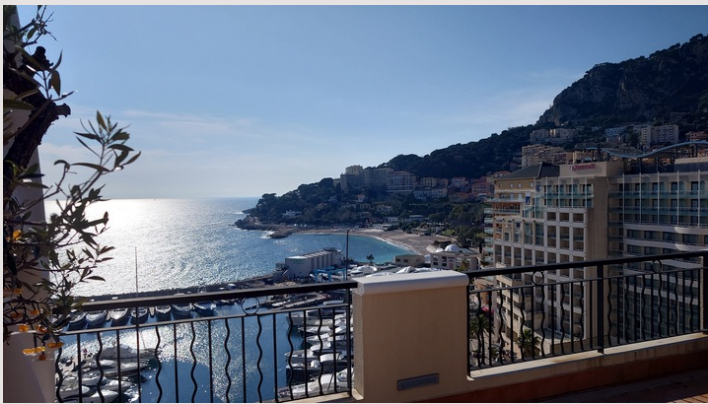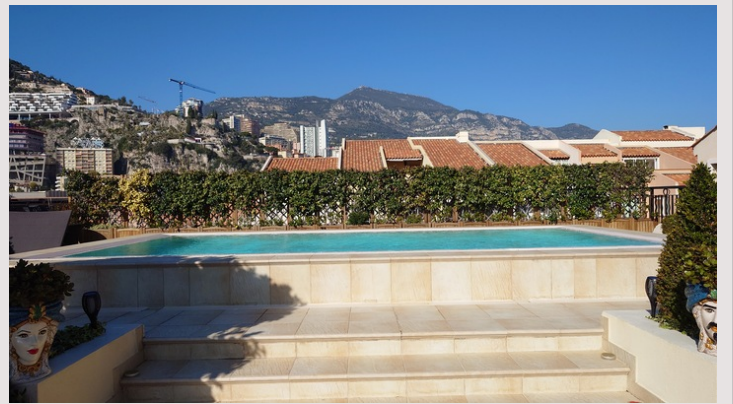

## A LOUER FONTVIEILLE 7 PIECES D'EXCEPTION AVEC PISCINE PRIVÉE

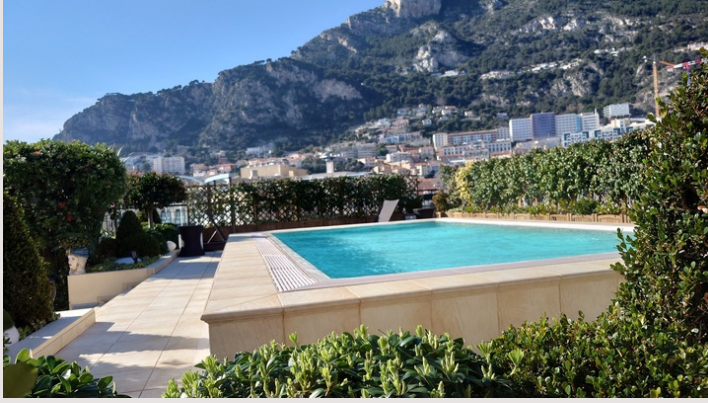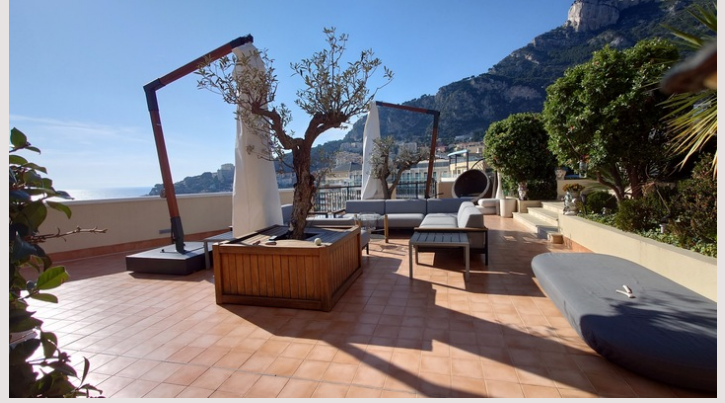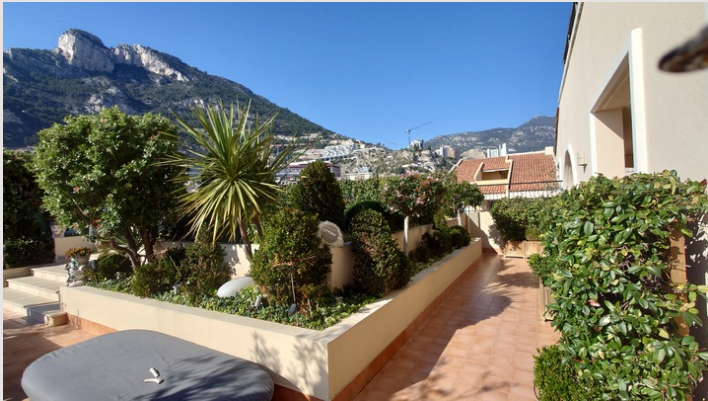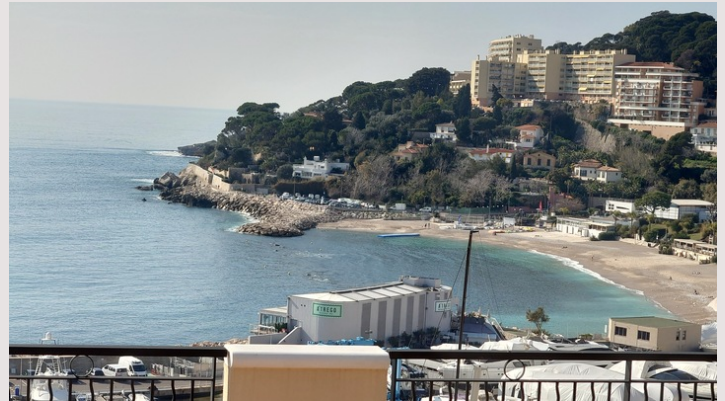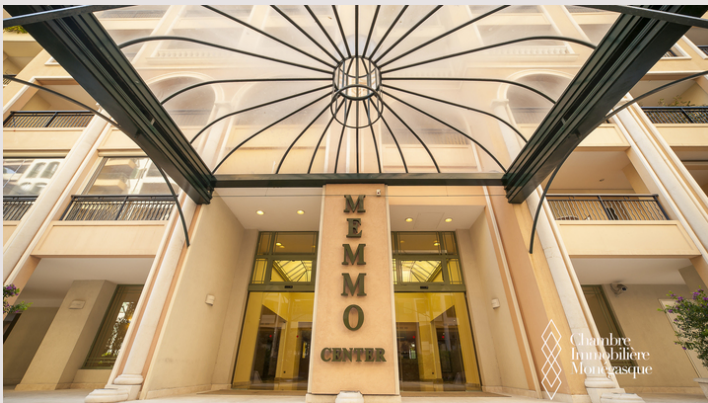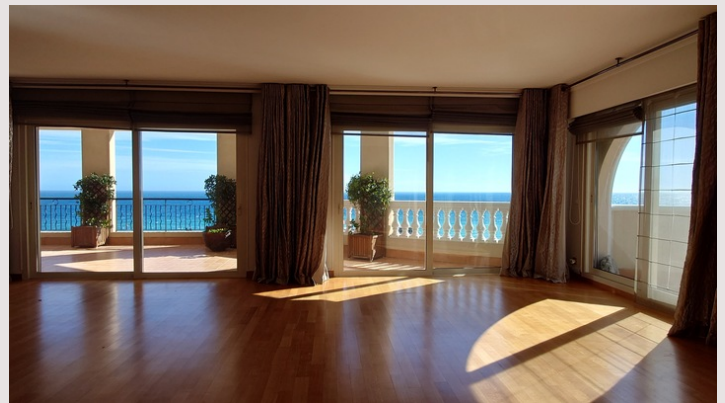



## A LOUER FONTVIEILLE 7 PIECES D'EXCEPTION AVEC PISCINE PRIVÉE

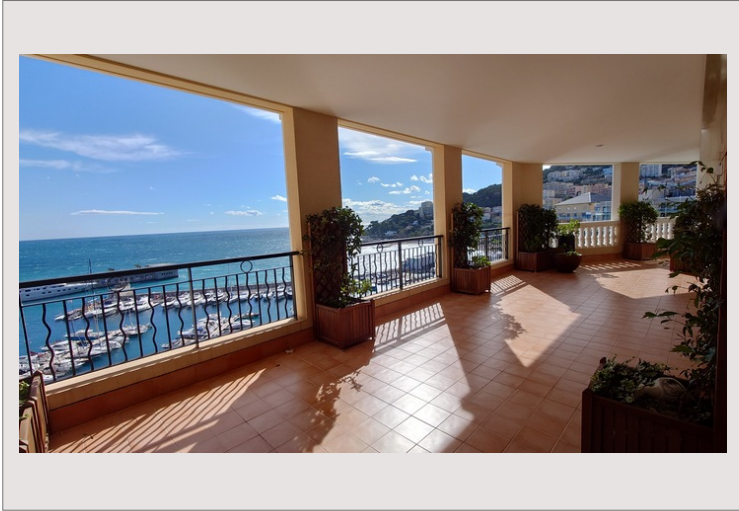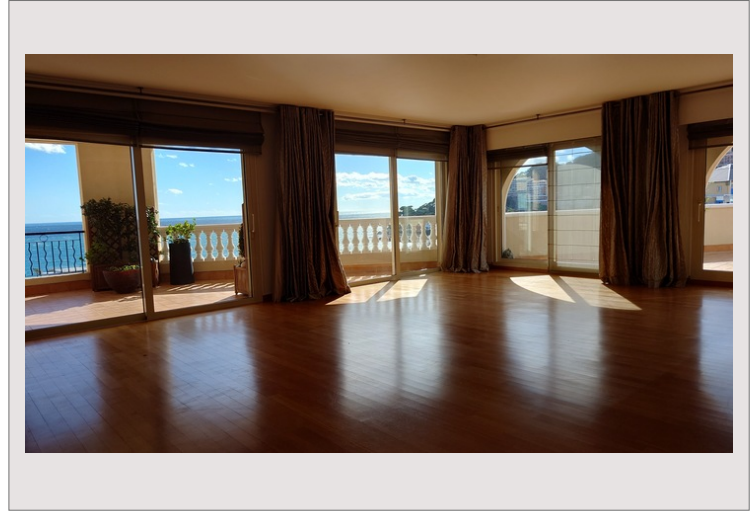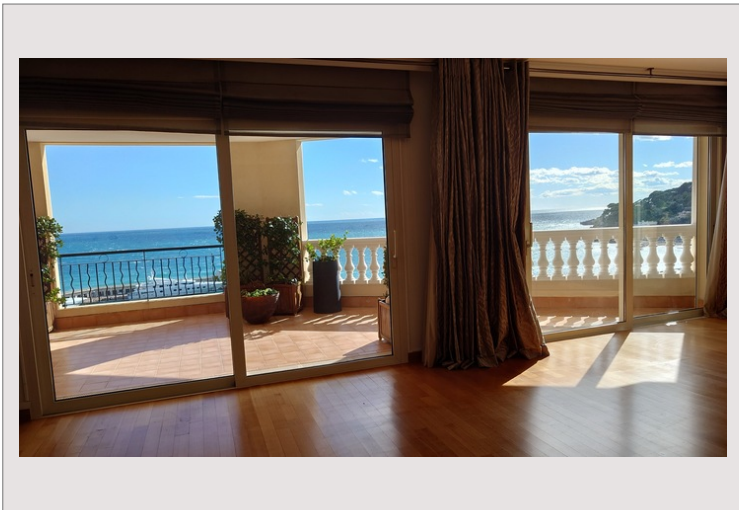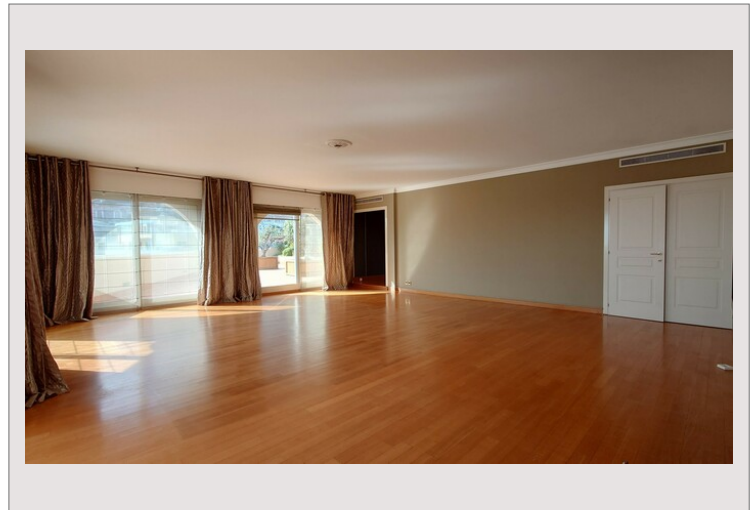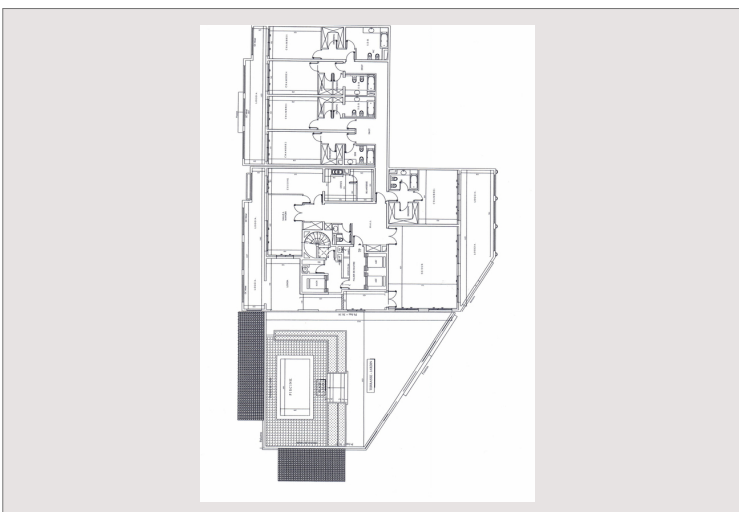

Supplement: mmc7 [file mmc7.pdf]
